# Supplementary material
Source: Springer Nature journal article supplement (https://www.springermedizin.de/resource/supplementary/12885_2014_4997_MOESM6_ESM.pdf/9467968)

# Study I

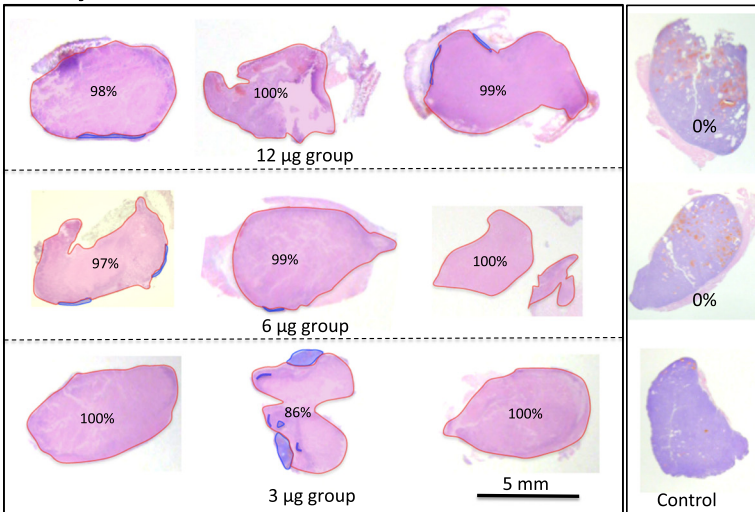

# Study II

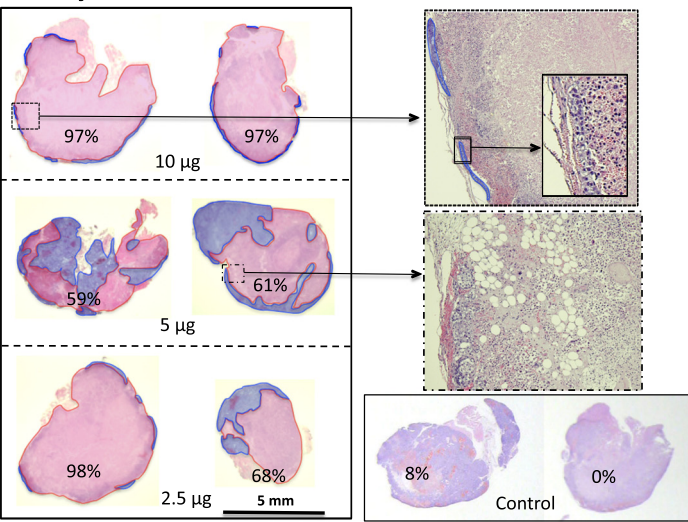

Supplement: MOESM6 [file 9467968]
